# Supplementary material for: Treatment outcomes and considerations for topical immunotherapy in patients with alopecia totalis and alopecia universalis
Source: Frontiers journal article supplement (doi:10.3389/fmed.2025.1573929), 2025-07-25
Supplement: Table_2.docx [file Table_2.docx]

| Supplementary Table 2. The patient characteristics of this study included 26 cases of alopecia totalis and 80 cases of alopecia universalis | | | | | |
| --- | --- | --- | --- | --- | --- |
| Variables |  |  |  |  | |
| Age |  |  | 1-91 | Median: 33 | |
| Gender | Male | | 44 cases |  |  |
|  | Female | | 62 cases |  |  |
| Disease duration |  |  | 1-612 months | Median 18 months | |
| Duration of topical immunotherapy | | | 3-125 Months | Median 24 months | |
| Cases with atopic dermatitis | | | 22 cases |  |  |
| Adverse events |  |  |  |  |  |
| Autosensitization dermatitis | |  | 9 cases |  |  |
