# Supplementary material for: Treatment outcomes and considerations for topical immunotherapy in patients with alopecia totalis and alopecia universalis
Source: Frontiers journal article supplement (doi:10.3389/fmed.2025.1573929), 2025-07-25
Supplement: Table_3.docx [file Table_3.docx]

| Supplementary Table 3. Comparison of the Efficacy of Topical Immunotherapy Based on Various Conditions | | | | | | | |
| --- | --- | --- | --- | --- | --- | --- | --- |
| Variables |  |  | Number of cases | Effective or Better response | Unchanged/Worsened |  | P value |
| Gender |  | Male | 44 | 34 | 10 |  | 0.5848 |
|  |  | Female | 62 | 45 | 17 |  |
|  |  |  |  |  |  |  |  |
| Age |  | <20 | 23 | 16 | 7 |  | 0.537 |
|  |  | >20 | 83 | 63 | 20 |  |
|  |  |  |  |  |  |  |  |
| Disease duration |  | <1 year | 43 | 34 | 9 |  | 0.3753 |
|  |  | >1 year | 63 | 45 | 18 |  |
|  |  |  |  |  |  |  |  |
| Atopic dermatitis | | Presence | 22 | 12 | 10 |  | 0.0157 |
|  |  | Absence | 84 | 67 | 17 |  |
