# Supplementary material for: Treatment outcomes and considerations for topical immunotherapy in patients with alopecia totalis and alopecia universalis
Source: Frontiers journal article supplement (doi:10.3389/fmed.2025.1573929), 2025-07-25
Supplement: Table_4.docx [file Table_4.docx]

| Supplementary Table 4. Comparison of the Efficacy of Topical Immunotherapy Based on Antihistamine Usage in Patients with Atopic Dermatitis | | | | | |
| --- | --- | --- | --- | --- | --- |
| Anti-histamine drug usage | Total number | Effective or Better response | Unchanged/Worsened |  | P value |
| + | 9 | 7 | 2 |  | 0.0991 |
| - | 13 | 5 | 8 |  |
