# Supplementary material for: Treatment outcomes and considerations for topical immunotherapy in patients with alopecia totalis and alopecia universalis
Source: Frontiers journal article supplement (doi:10.3389/fmed.2025.1573929), 2025-07-25
Supplement: Table_5.docx [file Table_5.docx]

| Supplementary Table 5. Univariate and multivariate analysis | | | | | |
| --- | --- | --- | --- | --- | --- |
| Variables | Univariate analysis | |  | Multivariate analysis | |
| Odds ratio | P-value |  | Odds ratio | P-value |
| Age | 0.9 (0.4-2.2) | 0.835 |  | 1.8 (0.57-5.5 | 0.323 |
| Gende | 0.6 (0.2-1.4) | 0.209 |  | 0.6 (0.2-1.6) | 0.346 |
| Duration | 1.5 (0.6-3.7) | 0.354 |  | 1.6 (0.6-4.2) | 0.320 |
| Presence of Atopic dermatitis | 3.3 (1.2-8.9) | 0.019 |  | 4.6 (1.3-16.4) | 0.020 |
| Antihistamine use | 0.5 (0.2-1.4) | 0.192 |  | 0.8 (0.3-2.3) | 0.649 |
