# Supplementary material for: Treatment outcomes and considerations for topical immunotherapy in patients with alopecia totalis and alopecia universalis
Source: Frontiers journal article supplement (doi:10.3389/fmed.2025.1573929), 2025-07-25
Supplement: Table_6.docx [file Table_6.docx]

| **Supplementary Table 6. Summary of Treatment Efficacy for DPCP, SADBE, and Combined Use** | | | |
| --- | --- | --- | --- |
| **Efficacy** | **DPCP only** | **SADBE only** | **Switching** |
| Excellent | 2 | 17 | 1 |
| Good | 2 | 19 | 4 |
| Partial | 3 | 26 | 5 |
| No response | 1 | 7 | 19 |
