# Supplementary material for: Treatment outcomes and considerations for topical immunotherapy in patients with alopecia totalis and alopecia universalis
Source: Frontiers journal article supplement (doi:10.3389/fmed.2025.1573929), 2025-07-25
Supplement: Table_7.docx [file Table_7.docx]

| **Supplementary Table 7. Pairwise Comparison of Treatment Efficacy with Bonferroni Correction** | | |
| --- | --- | --- |
| **Pairwise Comparison** | **Unadjusted p-value** | **Bonferroni-adjusted p-value** |
| DPCP only vs SADBE only | 1.00 | 1.00 |
| DPCP only vs Switching | 0.04 | 0.11 |
| SADBE only vs Switching | <0.01 | <0.01 |
